# Supplementary material
Source: MDPI journal article supplement (https://www.mdpi.com/2076-3417/11/22/10850)
Supplement: s1 [file s1]

# Metal Titanate (ATiO<sub>3</sub>, A: Ni, Co, Mg, Zn) Nanorods for Toluene Photooxidation under LED Illumination

Anna P. Souri <sup>1,2</sup>, Natalia Andrigiannaki <sup>2,3,4</sup>, Marilena Moschogiannaki <sup>1,2</sup>, Vasiliki Faka <sup>1,2</sup>, George Kir-iakidis <sup>2</sup>, Anna Malankowska <sup>4</sup>, Adriana Zaleska-Medynska <sup>4</sup> and Vassilios Binas <sup>2,3,\*</sup>

<sup>1</sup> Department of Materials Science and Technology, University of Crete, 71110 Herakleion, Greece; asouri@materials.uoc.gr (A.P.S.); marilenamosho@hotmail.com (M.M.); faka.vaso@iesl.forth.gr (V.F.)

<sup>2</sup> Institute of Electronic Structure and Laser, Foundation for Research and Technology-Hellas, 71110 Heraklion, Greece; andrnatalia@yahoo.gr (N.A.); kiriakid@iesl.forth.gr (G.K.)

<sup>3</sup> Department of Physics, University of Crete, 71110 Herakleion, Greece

<sup>4</sup> Department of Environmental Technology, Faculty of Chemistry, University of Gdansk, 80-308 Gdansk, Poland; anna.malankowska@ug.edu.pl (A.M.); adriana.zaleska-medynska@ug.edu.pl (A.Z.-M.)

\* Correspondence: binasbill@iesl.forth.gr; Tel.: +3-028-1039-1269

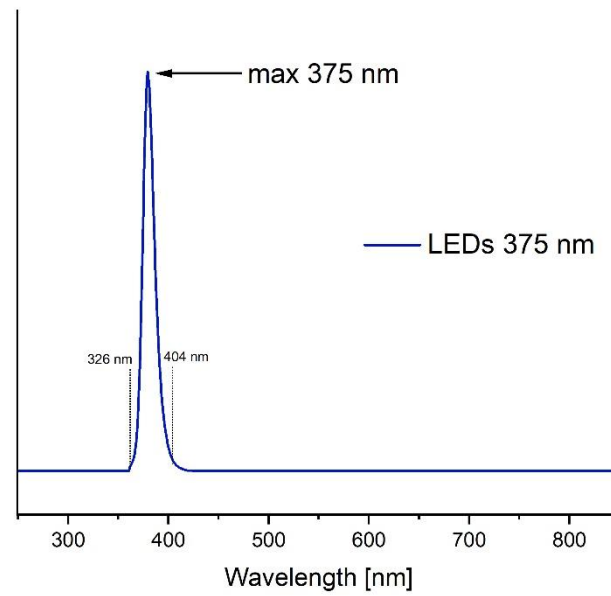

Fig. S1. Emission spectra of LEDs 375 nm

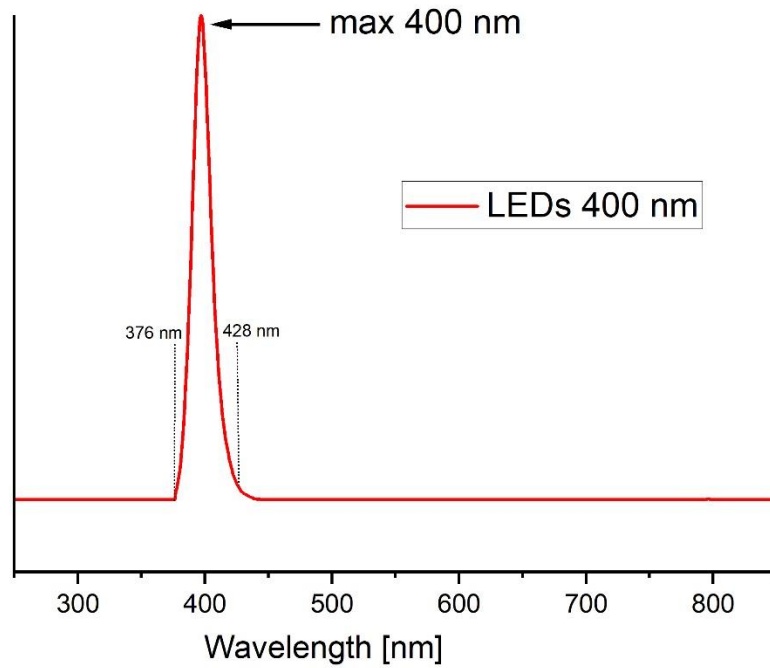

Fig. S2. Emission spectra of LEDs 400 nm

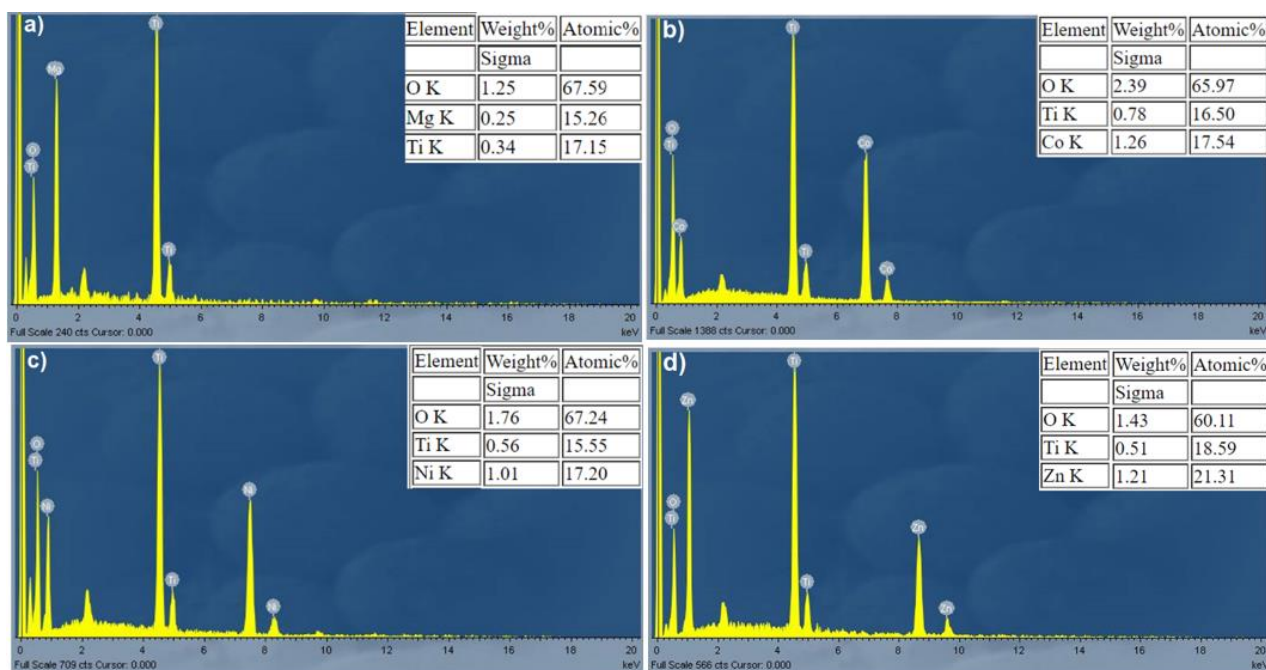

Fig. S3: EDX data of (a)  $\text{MgTiO}_3$ , (b)  $\text{CoTiO}_3$ , (c)  $\text{NiTiO}_3$  and (d)  $\text{ZnTiO}_3$ .

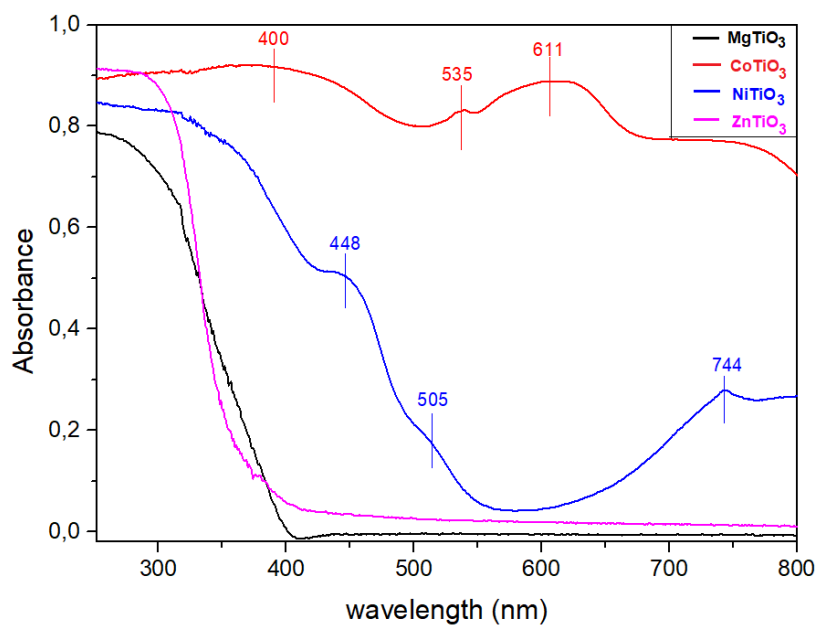

Fig. S4: UV-Vis absorption of metal titanate nanorods  $\text{ATiO}_3$  (A=Mg, Co, Ni, Zn) after annealing process.
